# Supplementary material
Source: PubMed Central journal article supplement (PMC8013232)
Supplement: 2916_tables.pdf [file 2916_tables.pdf]

**On-line Table 1: Univariate analysis of data according to age**

| Variable/Group                   | Younger than 80 Years (n = 66) | Older than 80 Years (n = 14) | P      |
|----------------------------------|--------------------------------|------------------------------|--------|
| Age ± SD (median)                | 59.3 ± 13.6 (62.5)             | 83.4 ± 3.4 (82.5)            | <0.001 |
| Gender, male (%)                 | 39 (59)                        | 4 (27)                       | 0.07   |
| Internal carotid occlusion (%)   | 31 (47)                        | 7 (50)                       | 0.93   |
| Proximal extracranial            | 15                             | 2                            |        |
| Distal intracranial              | 16                             | 5                            |        |
| Middle cerebral occlusion (%)    | 35 (53)                        | 7 (50)                       | 0.93   |
| Proximal (M1)                    | 34                             | 6                            |        |
| Distal (M2)                      | 1                              | 1                            |        |
| Involved hemisphere, left (%)    | 44 (66)                        | 11 (78)                      | 0.53   |
| Hypertension (%)                 | 32 (48.5)                      | 11 (78.5)                    | 0.08   |
| Ischemic heart disease (%)       | 23 (35)                        | 8 (57)                       | 0.21   |
| Atrial fibrillation (%)          | 25 (38)                        | 9 (64)                       | 0.13   |
| Diabetes mellitus (%)            | 18 (27)                        | 2 (14)                       | 0.49   |
| Hyperlipidemia (%)               | 25 (38)                        | 7 (50)                       | 0.59   |
| Smoking (%)                      | 29 (44)                        | 0 (0)                        | 0.005  |
| TOAST classification (%)         |                                |                              | <0.001 |
| Cardioembolic                    | 41 (62)                        | 13 (93)                      |        |
| Large vessel                     | 16 (24)                        | 1 (7)                        |        |
| Small vessel                     | 0                              | 0                            |        |
| Other                            | 4 (6)                          | 0                            |        |
| Unknown                          | 5 (8)                          | 0                            |        |
| Admission NIHSS score (median)   | 19.5 ± 5.2 (20)                | 21.4 ± 5.2 (23)              | 0.22   |
| Day 1 NIHSS score (median)       | 14.0 ± 7.4 (15)                | 19.1 ± 7.2 (20)              | 0.02   |
| Day 90 NIHSS score (median)      | 6.6 ± 4.4 (7)                  | 5.3 ± 4.0 (6)                | 0.10   |
| Modified Rankin score day 90 (%) |                                |                              | 0.008  |
| 0–2                              | 27 (41)                        | 0 (0)                        |        |
| 3                                | 14 (21)                        | 2 (14)                       |        |
| 4–5                              | 14 (21)                        | 6 (43)                       |        |
| 6                                | 11 (17)                        | 6 (43)                       |        |

**On-line Table 2: Comparison of procedure and postprocedure-associated variables**

| Variable/Group                  | Younger than 80 Years (n = 66) | Older than 80 Years (n = 14) | P     |
|---------------------------------|--------------------------------|------------------------------|-------|
| Onset to treatment (median)     | 5.4 ± 2.2 (5)                  | 5.8 ± 2.3 (5)                | 0.54  |
| Time to recanalization (median) | 6.2 ± 1.9 (6)                  | 7.1 ± 1.7 (7)                | 0.10  |
| Thrombectomy device (%)         | 14 (21)                        | 5 (36)                       | 1     |
| Stent retriever (Solitaire)     | 9 (14)                         | 2 (14)                       | 1     |
| Angioplasty (%)                 | 17 (26)                        | 2 (27)                       | 0.50  |
| Stent placement (%)             | 13 (20)                        | 2 (27)                       | 0.50  |
| Intra-arterial urokinase (%)    | 25 (38)                        | 8 (57)                       | 0.30  |
| Intra-arterial integrillin (%)  | 14 (21)                        | 3 (21)                       | 1     |
| Mechanical clot lysis (%)       | 50 (76)                        | 12 (86)                      | 0.73  |
| Postprocedure TIMI (%)          |                                |                              | 0.05  |
| 0–1                             | 15 (23)                        | 7 (50)                       |       |
| 2–3                             | 41 (67)                        | 7 (50)                       |       |
| Postprocedure TIMI 3 (%)        | 30 (45)                        | 2 (14)                       | 0.047 |
| Craniotomy (%)                  | 10 (15)                        | 0                            | 0.20  |
